# Supplementary material
Source: PubMed Central journal article supplement (PMC6902220)
Supplement: jamaoncol-6-108-s002.pdf [file jamaoncol-6-108-s002.pdf]

## Supplementary Online Content

Song M, Lee I-M, Manson JE, et al. Effect of supplementation with  $\omega$ -3 fatty acid on risk of colorectal adenomas and serrated polyps in the US general population: a prespecified ancillary study of a randomized clinical trial. *JAMA Oncol*. Published online November 21, 2019. doi:10.1001/jamaoncol.2019.4587

**eFigure.** Flowchart of Colorectal Polyp Identification in VITAL

**eTable 1.** Association of Marine Omega-3 Fatty Acid Supplementation With Risk of Conventional Adenomas and Serrated Polyps According to Histopathological Features

**eTable 2.** Stratified Association of Marine Omega-3 Fatty Acid Supplementation With Risk of Conventional Adenoma and Serrated Polyp

**eTable 3.** Baseline Characteristics of Participants According to Race/Ethnicity

This supplementary material has been provided by the authors to give readers additional information about their work.

**eFigure.** Flowchart of Colorectal Polyp Identification in VITAL

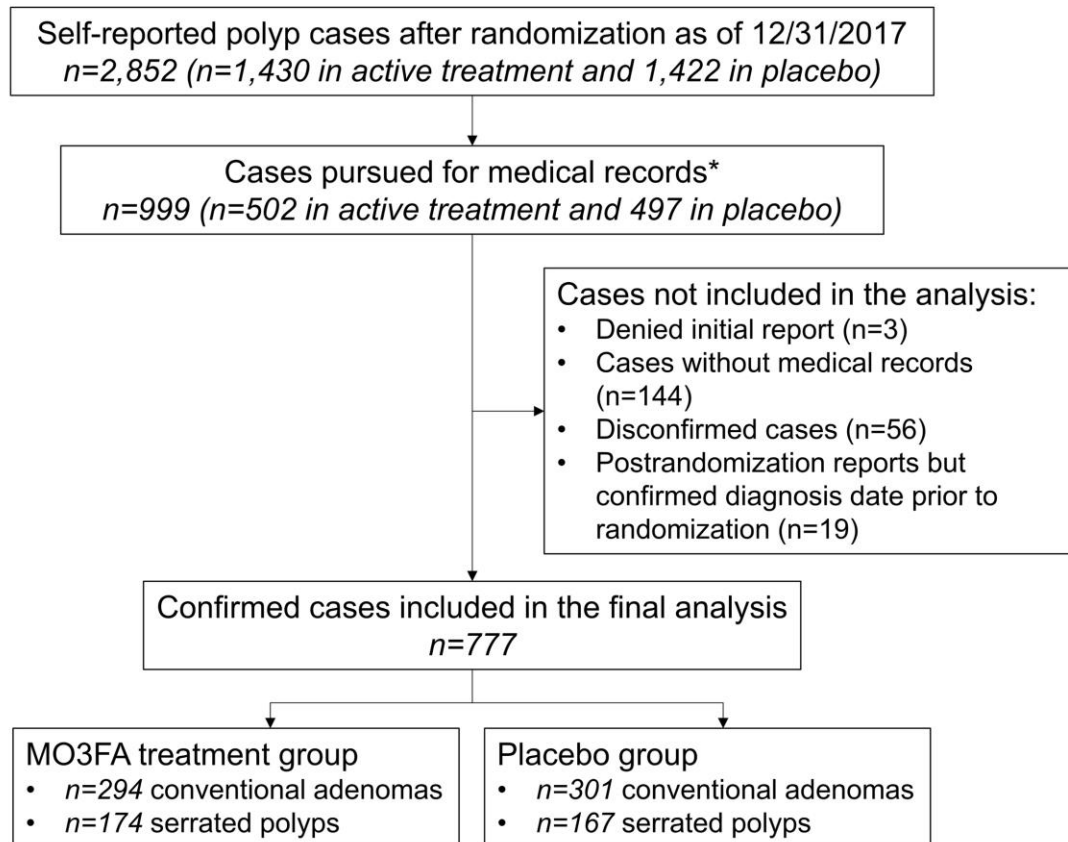

\*We only pursued medical record collection for cases who were asked by their doctors to have a repeat colonoscopy/sigmoidoscopy in 5 years or less.

**eTable 1.** Association of Marine Omega-3 Fatty Acid Supplementation With Risk of Conventional Adenomas and Serrated Polyps According to Histopathological Features

|                                         | Conventional adenomas         |                               |                          | Serrated polyps               |                               |                          |
|-----------------------------------------|-------------------------------|-------------------------------|--------------------------|-------------------------------|-------------------------------|--------------------------|
|                                         | No. of cases in placebo group | No. of cases in omega-3 group | OR (95% CI) <sup>a</sup> | No. of cases in placebo group | No. of cases in omega-3 group | OR (95% CI) <sup>a</sup> |
| Size                                    |                               |                               |                          |                               |                               |                          |
| <10mm                                   | 222                           | 218                           | 0.98 (0.82-1.19)         | 122                           | 124                           | 1.02 (0.79-1.31)         |
| ≥10mm                                   | 58                            | 56                            | 0.98 (0.67-1.41)         | 31                            | 32                            | 1.04 (0.63-1.70)         |
| <i>P</i> for heterogeneity <sup>b</sup> |                               |                               | 0.84                     |                               |                               | 0.93                     |
| Location                                |                               |                               |                          |                               |                               |                          |
| Proximal colon                          | 149                           | 150                           | 1.01 (0.80-1.27)         | 57                            | 65                            | 1.14 (0.80-1.63)         |
| Distal colon                            | 74                            | 52                            | 0.71 (0.49-1.01)         | 37                            | 43                            | 1.17 (0.75-1.81)         |
| Rectum                                  | 17                            | 15                            | 0.89 (0.44-1.77)         | 32                            | 36                            | 1.13 (0.70-1.82)         |
| Multiple location                       | 61                            | 77                            | 1.27 (0.91-1.79)         | 41                            | 30                            | 0.73 (0.46-1.18)         |
| <i>P</i> for heterogeneity <sup>b</sup> |                               |                               | 0.15                     |                               |                               | 0.40                     |
| Multiplicity                            |                               |                               |                          |                               |                               |                          |
| Single                                  | 159                           | 147                           | 0.93 (0.74-1.16)         | 80                            | 99                            | 1.24 (0.92-1.66)         |
| Multiple                                | 135                           | 141                           | 1.05 (0.83-1.33)         | 80                            | 66                            | 0.83 (0.60-1.15)         |
| <i>P</i> for heterogeneity <sup>b</sup> |                               |                               | 0.44                     |                               |                               | 0.11                     |
| Histology                               |                               |                               |                          |                               |                               |                          |

|                                         |     |     |                  |   |   |
|-----------------------------------------|-----|-----|------------------|---|---|
| Tubular adenoma                         | 262 | 242 | 0.93 (0.78-1.11) | - | - |
| Tubulovillous adenoma                   | 20  | 23  | 1.16 (0.64-2.11) | - | - |
| Villous or high-grade dysplasia         | 5   | 13  | 2.65 (0.95-7.44) | - | - |
| <i>P</i> for heterogeneity <sup>b</sup> |     |     | 0.16             | - | - |

Abbreviations: CI, confidence interval; OR, odds ratio.

<sup>a</sup>Logistic regression was adjusted for age, sex, vitamin D treatment assignment, and use of colonoscopy or sigmoidoscopy in the past 10 years prior to randomization.

<sup>b</sup>*P* for heterogeneity was calculated by a case-only analysis.

**eTable 2.** Stratified Association of Marine Omega-3 Fatty Acid Supplementation With Risk of Conventional Adenoma and Serrated Polyp<sup>a</sup>

|                                       | Conventional adenomas         |                               |                  | Serrated polyps               |                               |                  |
|---------------------------------------|-------------------------------|-------------------------------|------------------|-------------------------------|-------------------------------|------------------|
|                                       | No. of cases in placebo group | No. of cases in omega-3 group | OR (95% CI)      | No. of cases in placebo group | No. of cases in omega-3 group | OR (95% CI)      |
| Age, year                             |                               |                               |                  |                               |                               |                  |
| <60                                   | 43                            | 36                            | 0.83 (0.53-1.30) | 25                            | 26                            | 1.04 (0.60-1.81) |
| 60-69                                 | 197                           | 182                           | 0.93 (0.76-1.14) | 109                           | 114                           | 1.05 (0.81-1.37) |
| ≥70                                   | 61                            | 76                            | 1.26 (0.90-1.77) | 33                            | 34                            | 1.01 (0.62-1.64) |
| <i>P</i> for interaction <sup>b</sup> |                               |                               | 0.24             |                               |                               | 0.99             |
| Sex                                   |                               |                               |                  |                               |                               |                  |
| Women                                 | 118                           | 133                           | 1.13 (0.88-1.45) | 65                            | 84                            | 1.29 (0.93-1.79) |
| Men                                   | 183                           | 161                           | 0.88 (0.71-1.09) | 102                           | 90                            | 0.89 (0.67-1.18) |
| <i>P</i> for interaction <sup>b</sup> |                               |                               | 0.14             |                               |                               | 0.08             |
| Race/ethnicity                        |                               |                               |                  |                               |                               |                  |
| Non-Hispanic white                    | 231                           | 245                           | 1.06 (0.89-1.28) | 131                           | 145                           | 1.11 (0.87-1.41) |
| African American                      | 37                            | 22                            | 0.59 (0.35-1.00) | 20                            | 12                            | 0.60 (0.29-1.23) |
| Others                                | 27                            | 22                            | 0.86 (0.48-1.52) | 13                            | 14                            | 1.10 (0.51-2.36) |
| <i>P</i> for interaction <sup>b</sup> |                               |                               | 0.11             |                               |                               | 0.28             |
| Plasma omega-3 index, %               |                               |                               |                  |                               |                               |                  |
| <2.5%                                 | 106                           | 83                            | 0.76 (0.57-1.02) | 59                            | 67                            | 1.12 (0.79-1.60) |
| ≥2.5%                                 | 99                            | 114                           | 1.19 (0.90-1.56) | 59                            | 61                            | 1.06 (0.74-1.52) |

|                                       |     |     |                  |     |     |                  |
|---------------------------------------|-----|-----|------------------|-----|-----|------------------|
| <i>P</i> for interaction <sup>b</sup> |     |     | 0.03             |     |     | 0.83             |
| Total fish intake, serving/week       |     |     |                  |     |     |                  |
| <1.5                                  | 156 | 145 | 0.92 (0.73-1.16) | 77  | 96  | 1.24 (0.91-1.67) |
| ≥1.5                                  | 140 | 148 | 1.08 (0.85-1.36) | 87  | 78  | 0.91 (0.67-1.24) |
| <i>P</i> for interaction <sup>b</sup> |     |     | 0.35             |     |     | 0.17             |
| Body mass index, kg/m <sup>2</sup>    |     |     |                  |     |     |                  |
| <25                                   | 79  | 97  | 1.25 (0.92-1.68) | 49  | 48  | 0.99 (0.66-1.48) |
| 25-29.9                               | 133 | 106 | 0.81 (0.62-1.04) | 70  | 65  | 0.94 (0.67-1.33) |
| ≥30                                   | 80  | 86  | 1.06 (0.78-1.44) | 45  | 57  | 1.24 (0.84-1.84) |
| <i>P</i> for interaction <sup>b</sup> |     |     | 0.09             |     |     | 0.57             |
| Physical activity, MET-hours/week     |     |     |                  |     |     |                  |
| <15                                   | 137 | 124 | 0.91 (0.71-1.16) | 62  | 70  | 1.14 (0.81-1.60) |
| ≥15                                   | 162 | 168 | 1.04 (0.84-1.30) | 103 | 102 | 0.99 (0.75-1.31) |
| <i>P</i> for interaction <sup>b</sup> |     |     | 0.41             |     |     | 0.56             |
| Smoking                               |     |     |                  |     |     |                  |
| Never                                 | 151 | 155 | 1.04 (0.83-1.30) | 76  | 77  | 1.02 (0.74-1.41) |
| Past                                  | 127 | 119 | 0.93 (0.72-1.20) | 70  | 82  | 1.16 (0.84-1.60) |
| Current                               | 20  | 19  | 0.98 (0.52-1.84) | 17  | 13  | 0.78 (0.38-1.61) |
| <i>P</i> for interaction <sup>b</sup> |     |     | 0.82             |     |     | 0.53             |
| Alcohol use                           |     |     |                  |     |     |                  |
| <1/week                               | 90  | 86  | 0.96 (0.71-1.30) | 43  | 55  | 1.28 (0.86-1.91) |
| ≥1/week                               | 207 | 207 | 1.00 (0.82-1.22) | 123 | 119 | 0.97 (0.75-1.25) |

|                                                           |     |     |                  |  |     |     |                  |
|-----------------------------------------------------------|-----|-----|------------------|--|-----|-----|------------------|
| <i>P</i> for interaction <sup>b</sup>                     |     |     | 0.82             |  |     |     | 0.25             |
| Aspirin use                                               |     |     |                  |  |     |     |                  |
| No                                                        | 156 | 141 | 0.90 (0.72-1.14) |  | 90  | 90  | 1.00 (0.75-1.34) |
| Yes                                                       | 141 | 152 | 1.09 (0.86-1.37) |  | 72  | 81  | 1.14 (0.83-1.57) |
| <i>P</i> for interaction <sup>b</sup>                     |     |     | 0.27             |  |     |     | 0.57             |
| History of colorectal polyps                              |     |     |                  |  |     |     |                  |
| No                                                        | 285 | 282 | 0.98 (0.83-1.16) |  | 159 | 171 | 1.07 (0.86-1.33) |
| Yes                                                       | 16  | 12  | 0.77 (0.36-1.64) |  | 8   | 3   | 0.39 (0.10-1.46) |
| <i>P</i> for interaction <sup>b</sup>                     |     |     | 0.54             |  |     |     | 0.14             |
| History of colonoscopy/sigmoidoscopy in the past 10 years |     |     |                  |  |     |     |                  |
| No                                                        | 70  | 66  | 0.96 (0.68-1.35) |  | 46  | 43  | 0.95 (0.62-1.44) |
| Yes                                                       | 231 | 228 | 0.98 (0.82-1.18) |  | 121 | 131 | 1.08 (0.84-1.39) |
| <i>P</i> for interaction <sup>b</sup>                     |     |     | 0.93             |  |     |     | 0.61             |
| Randomization in vitamin D portion of trial               |     |     |                  |  |     |     |                  |
| Placebo group                                             | 136 | 151 | 1.12 (0.88-1.41) |  | 82  | 87  | 1.06 (0.79-1.44) |
| Vitamin D group                                           | 165 | 143 | 0.87 (0.69-1.09) |  | 85  | 87  | 1.03 (0.76-1.39) |
| <i>P</i> for interaction <sup>b</sup>                     |     |     | 0.13             |  |     |     | 0.86             |

Abbreviations: CI, confidence interval; DHA, docosahexaenoic acid; EPA, eicosapentaenoic acid; MET, metabolic equivalent; OR, odds ratio.

<sup>a</sup>All stratified variables were assessed at baseline enrollment. For dietary fish intake and plasma measurements, median level was used the cutoff. Logistic regression was used to calculate the odds ratio with adjustment for age, sex, vitamin D treatment assignment, and use of colonoscopy or sigmoidoscopy in the past 10 years prior to randomization.

<sup>b</sup>*P* for interaction was calculated by Wald test for the product term between intervention assignment and the stratified variable.

**eTable 3.** Baseline Characteristics of Participants According to Race/Ethnicity<sup>a</sup>

| Variable                                     | African American | Non-Hispanic white | Others      | P value |
|----------------------------------------------|------------------|--------------------|-------------|---------|
| Age, year                                    | 63.4 (6.9)       | 68.1 (6.8)         | 67.6 (6.9)  | <0.001  |
| Women, %                                     | 3,159 (62)       | 8,685 (48)         | 904 (42)    | <0.001  |
| Family history of colorectal cancer, %       | 568 (13)         | 2320 (14)          | 226 (12)    | 0.03    |
| Colonoscopy in the past 10 years, %          | 3,436 (67)       | 13,569 (75)        | 1,506 (70)  | <0.001  |
| Sigmoidoscopy in the past 10 years, %        | 439 (9)          | 2,425 (14)         | 282 (14)    | <0.001  |
| Smoking status, %                            |                  |                    |             | <0.001  |
| Never                                        | 2,530 (51)       | 9,233 (52)         | 1,136 (54)  |         |
| Past                                         | 1,744 (35)       | 7,662 (43)         | 829 (39)    |         |
| Current                                      | 711 (14)         | 935 (5)            | 149 (7)     |         |
| Body mass index, kg/m <sup>2</sup>           | 30.6 (6.8)       | 27.4 (5.2)         | 28.0 (5.7)  | <0.001  |
| Physical activity, MET-hours/week            | 19.5 (28.9)      | 23.5 (24.3)        | 23.6 (29.6) | <0.001  |
| Use of aspirin, %                            | 1,950 (39)       | 8,446 (45)         | 899 (42)    | <0.001  |
| Use of vitamin D supplements, % <sup>b</sup> | 1,460 (29)       | 8,632 (48)         | 702 (33)    | <0.001  |
| Use of calcium supplements, %                | 635 (12)         | 4,054 (22)         | 363 (17)    | <0.001  |
| Use of multivitamin supplements, %           | 1,995 (40)       | 8,332 (47)         | 832 (40)    | <0.001  |
| Alcohol use, %                               |                  |                    |             | <0.001  |
| Never                                        | 2,271 (46)       | 4,777 (27)         | 741 (36)    |         |
| Rarely to less than once per week            | 461 (9)          | 1217 (7)           | 184 (9)     |         |
| 1-6/week                                     | 1,604 (32)       | 6,383 (36)         | 731 (35)    |         |
| Daily                                        | 605 (12)         | 5480 (30)          | 424 (20)    |         |
| Plasma fatty acid composition, %             |                  |                    |             |         |
| EPA                                          | 0.55 (0.34)      | 0.61 (0.36)        | 0.57 (0.37) | <0.001  |
| DHA                                          | 2.28 (0.71)      | 1.98 (0.64)        | 2.01 (0.72) | <0.001  |
| Omega-3 index <sup>c</sup>                   | 2.83 (0.93)      | 2.58 (0.90)        | 2.58 (0.98) | <0.001  |
| Dark meat fish intake, serving/week          | 1.4 (3.1)        | 0.9 (1.1)          | 1.1 (2.7)   | <0.001  |
| Other fish and seafood, serving/week         | 1.6 (4.4)        | 1.0 (1.2)          | 1.2 (2.5)   | <0.001  |
| Processed meat, serving/week                 | 2.0 (3.5)        | 1.3 (2.0)          | 1.4 (2.5)   | <0.001  |

Abbreviations: DHA, docosahexaenoic acid; EPA, eicosapentaenoic acid; MET, metabolic equivalent.

<sup>a</sup>Mean (standard deviation) and percentage are presented for continuous and categorical variables, respectively.

<sup>b</sup>To be eligible for the trial, participants are required to limit consumption of supplemental vitamin D to no more than 800 IU/day from all supplemental sources combined.

<sup>c</sup>Omega-3 index was calculated as the sum of plasma EPA and DHA composition.
