# Supplementary material
Source: PubMed Central journal article supplement (PMC6902220)
Supplement: jamaoncol-6-108-s003.pdf [file jamaoncol-6-108-s003.pdf]

## Data Sharing Statement

Song. Effect of Supplementation With Marine  $\omega$ -3 Fatty Acid on Risk of Colorectal Adenomas and Serrated Polyps in the US General Population. *JAMA Oncol*. Published November 21, 2019. 10.1001/jamaoncol.2019.4587

### Data

**Data available:** Yes

**Data types:** Deidentified participant data

**How to access data:** The data will be made available to others upon request after November 10, 2020 (email: [jmanson@rics.bwh.harvard.edu](mailto:jmanson@rics.bwh.harvard.edu)).

**When available:** beginning date: 11-11-2020

### Supporting Documents

**Document types:** None

### Additional Information

**Who can access the data:** Researchers whose proposed use of the data has been approved

**Types of analyses:** For a specified purpose.

**Mechanisms of data availability:** The data will be available with investigator support, approval of a proposal, and a signed data access agreement.
